# Supplementary material for: Light wavelength-dependent E. coli survival changes after simulated solar disinfection of secondary effluent
Source: Royal Society of Chemistry journal article supplement (doi:10.1039/c5pp00110b), 2015-10-08
Supplement: c5pp00110b1.pdf [file c5pp00110b1.pdf]

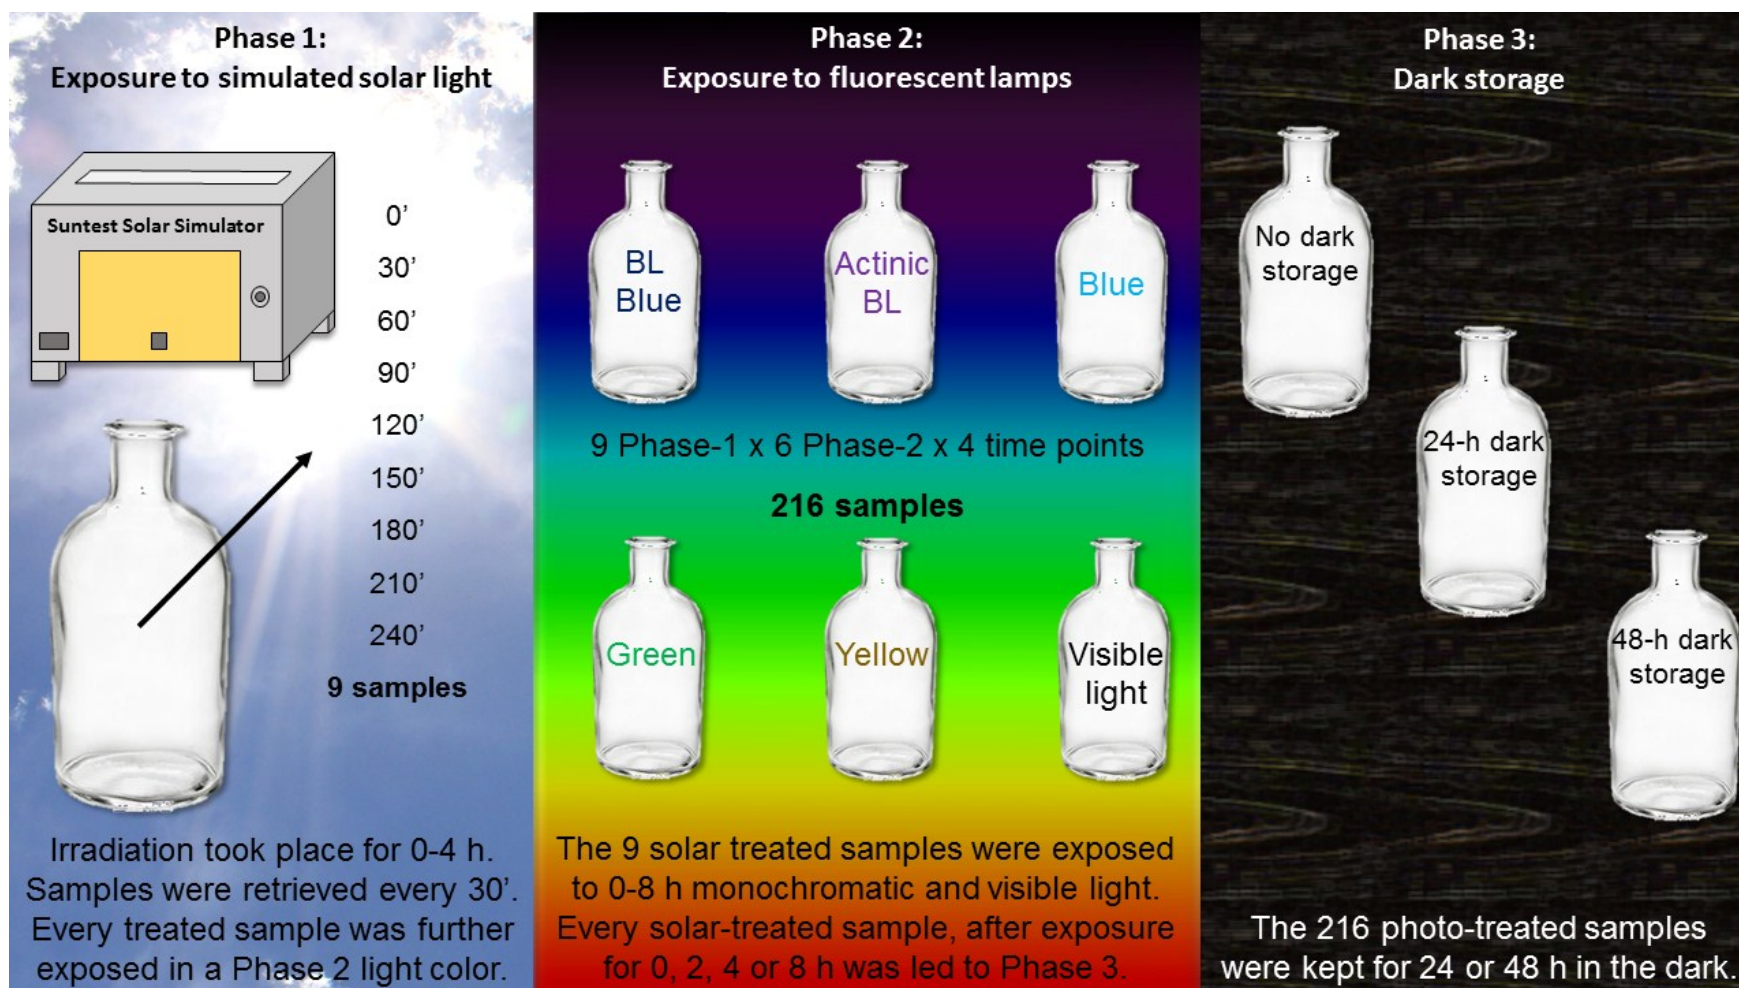

*Supplementary Figure 1 – Schematic representation of the experimental sequence.*

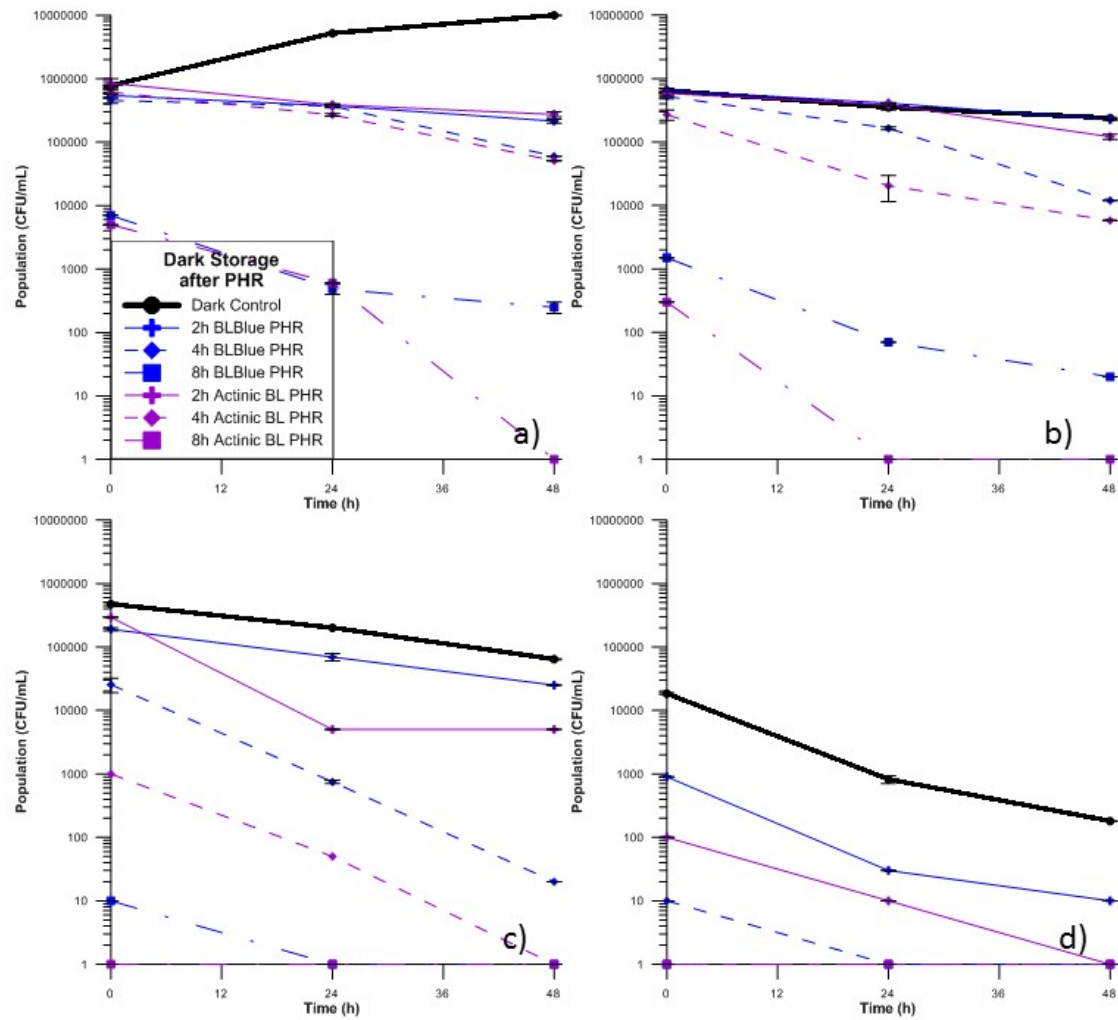

Supplementary Figure 2 – Results of the dark storage of samples after solar exposure and BL Blue or actinic BL light. a) without solar pre-treatment. b) after 1 h solar pre-treatment. c) after 2 h solar pre-treatment. d) PHR after 3 h solar pre-treatment. The experimental values acquired are connected by a line for better visualization of the results.

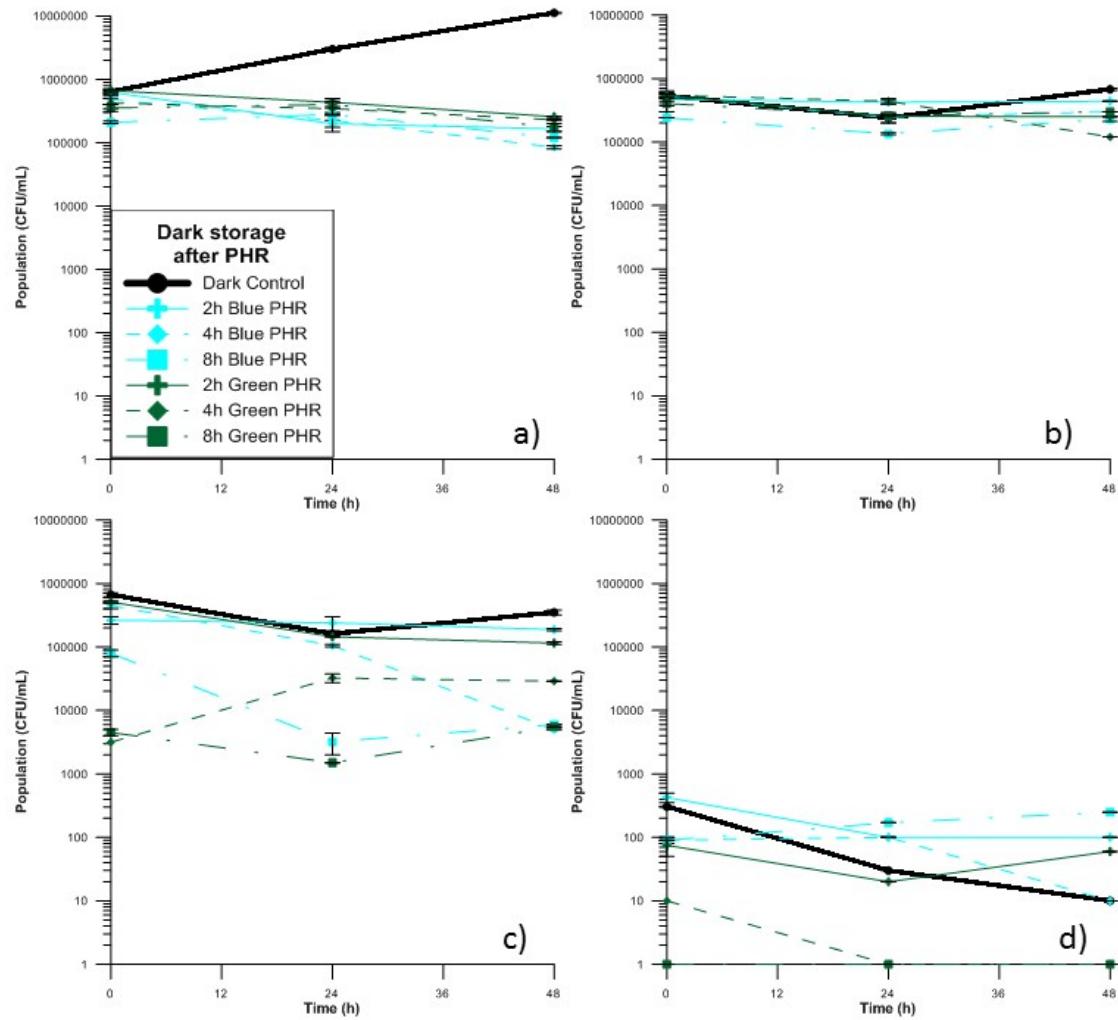

Supplementary Figure 3 – Results of the dark storage of samples after solar exposure and blue or green light. a) without solar pre-treatment. b) after 1 h solar pre-treatment. c) after 2 h solar pre-treatment. d) PHR after 3 h solar pre-treatment. The experimental values acquired are connected by a line for better visualization of the results.

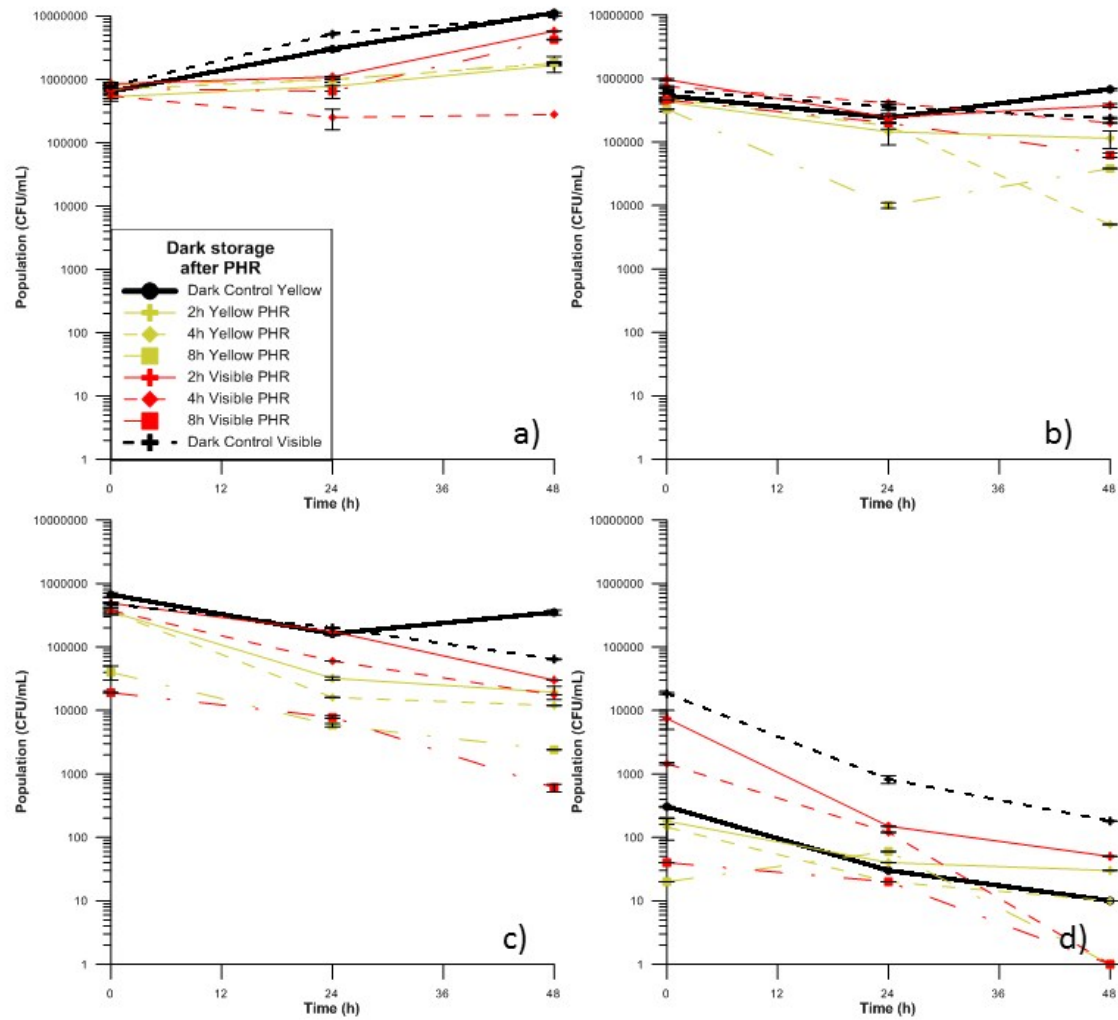

Supplementary Figure 4 – Results of the dark storage of samples after solar exposure and yellow or indoor light. a) without solar pre-treatment. b) after 1 h solar pre-treatment. c) after 2 h solar pre-treatment. d) PHR after 3 h solar pre-treatment. The experimental values acquired are connected by a line for better visualization of the results.
